# Supplementary material for: Unveiling the luminescence property of Li2MgGeO4:Mn4+ featuring the tetrahedral crystallographic-site occupancy of Mn4+
Source: Royal Society of Chemistry journal article supplement (doi:10.1039/d4dt00863d), 2024-01-01
Supplement: d4dt00863d1.pdf [file d4dt00863d1.pdf]

## Supplementary information

# Unveiling luminescence property of $\text{Li}_2\text{MgGeO}_4:\text{Mn}^{4+}$ featuring tetrahedral crystallographic-site occupancy of $\text{Mn}^{4+}$

Mingshun Zhang<sup>a,#</sup>, Anqi Sun<sup>b,#</sup>, Xiaoniu Li<sup>b</sup>, Shijie Sun<sup>a</sup>, Wei Ding<sup>b</sup>, Dong Fang<sup>a</sup>, Baoxiu Mi<sup>a,\*</sup>, Zhiqiang Gao<sup>b,\*</sup>

<sup>a</sup>State Key Laboratory for Organic Electronics and Information Displays, Jiangsu National Synergetic Innovation Center for Advanced Materials (SICAM), Institute of Advanced Materials (IAM), Nanjing University of Posts & Telecommunications, Wenyuan Road, No. 9, Nanjing 210023, P. R. China. E-mail: [iambxmi@njupt.edu.cn](mailto:iambxmi@njupt.edu.cn)

<sup>b</sup>Jiangsu Engineering Centre for Plate Displays & Solid-State Lighting, School of Material Science and Engineering, Nanjing University of Posts & Telecommunications, Wenyuan Road, No.9, Nanjing 210023, P. R. China. E-mail: [iamzqgao@njupt.edu.cn](mailto:iaczqgao@njupt.edu.cn)

# These authors contributed equally to the work and should be regarded as co-first authors.

\* Corresponding author.

### Contents

1. XRD patterns of LMGO-Mn-1.2 sintered at 1400 °C (**Fig. S1**).
2. Rietveld refinements of LMGO-Mn-0.6 and LMGO-Mn-1.0 (**Fig. S2, Table S1- S2**)
3. Rietveld refinements of LMGO:1.0%Mn<sup>4+</sup>:1.0MgO in terms of different Mn<sup>4+</sup> occupation in matrix LMGO (**Fig. S3, Table S3-S14**).
4. Rietveld refinements of LMGO-Mn-1.0 without and with Mg<sup>2+</sup> occupation to Li<sup>+</sup> defects (**Fig. S4, Table S15-S16**).
5. The fitted results from PL spectrum of LMGO-Mn-1.2 (**Fig. S5**).
6. The decay dynamics parameters of LMGO-Mn-0.0 to LMGO-Mn-1.5 red phosphors (**Table S17**)

## Details

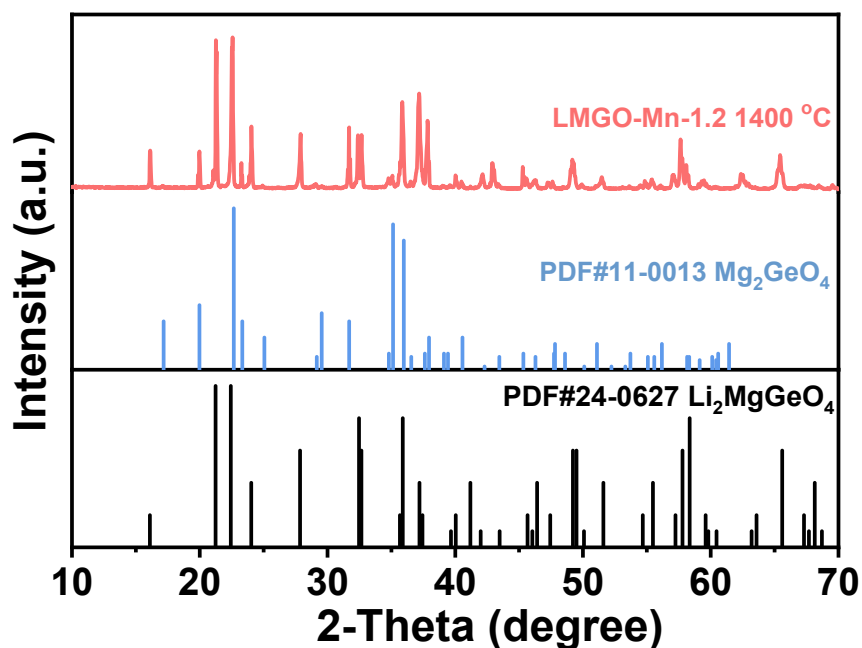

Fig. S1 XRD patterns of LMGO-Mn-1.2 sintered at 1400 °C.

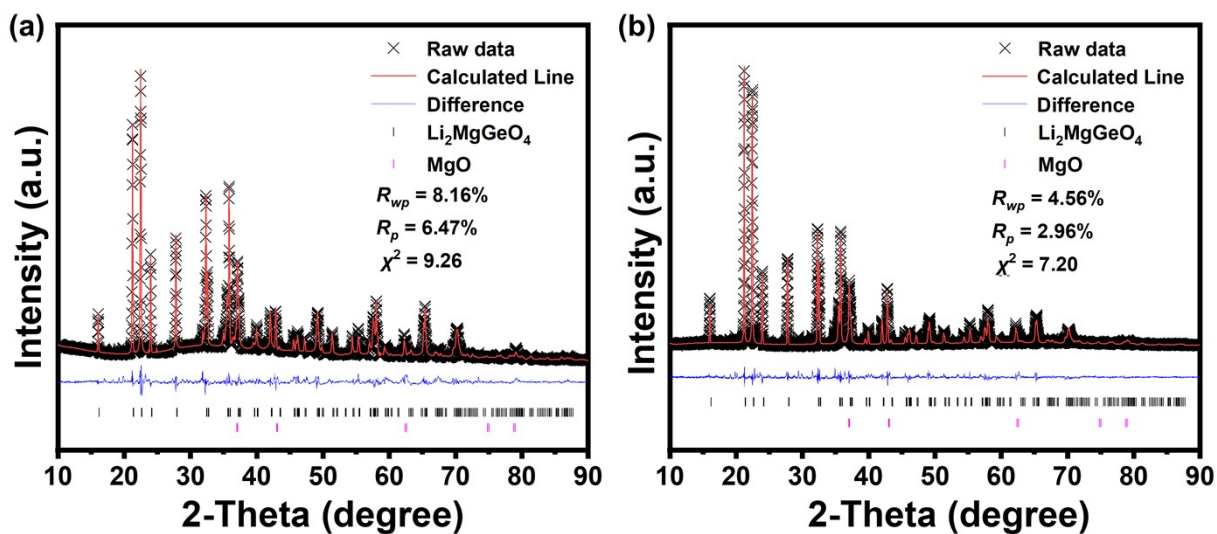

Fig. S2 Rietveld refinement of (a) LMGO-Mn-0.6 and (b) LMGO-Mn-1.0. The black cross, red line and blue line represent the experimental data, calculated result and their difference, respectively. The black and pink vertical lines below the different profiles represent the position of  $\text{Li}_2\text{MgGeO}_4$  and MgO Bragg reflections, respectively.

**Table S1** Refined parameters of LMGO-Mn-0.6 derived from the Rietveld refinement of the X-ray diffraction data.

| Atom | X      | Y      | Z      | Occupancy |
|------|--------|--------|--------|-----------|
| Ge   | 0.0000 | 0.6732 | 0.0057 | 1.0000    |
| Mg   | 0.0000 | 0.3389 | 0.4774 | 1.0000    |
| Li   | 0.2557 | 0.1784 | 0.0023 | 1.0000    |
| O3   | 0.2301 | 0.8384 | 0.8867 | 1.0000    |
| O4   | 0.0000 | 0.3486 | 0.9118 | 1.0000    |
| O5   | 0.0000 | 0.7108 | 0.3791 | 1.0000    |

Cell parameters:  $a = 6.3914 \text{ \AA}$ ,  $b = 5.4725 \text{ \AA}$ ,  $c = 4.9998 \text{ \AA}$ ,  $\alpha = \beta = \gamma = 90^\circ$ ,  $V = 174.878 \text{ \AA}^3$ ;  
space group: Pmn21(31).

**Table S2** Refined parameters of LMGO-Mn-1.0 derived from the Rietveld refinement of the X-ray diffraction data.

| Atom | X      | Y      | Z       | Occupancy |
|------|--------|--------|---------|-----------|
| Ge   | 0.0000 | 0.6731 | 0.00413 | 1.0000    |
| Mg   | 0.0000 | 0.3219 | 0.4853  | 1.0000    |
| Li   | 0.2534 | 0.1705 | 0.0019  | 1.0000    |
| O3   | 0.2218 | 0.8399 | 0.8680  | 1.0000    |
| O4   | 0.0000 | 0.3585 | 0.9099  | 1.0000    |
| O5   | 0.0000 | 0.7087 | 0.3675  | 1.0000    |

Cell parameters:  $a = 6.3918 \text{ \AA}$ ,  $b = 5.4742 \text{ \AA}$ ,  $c = 4.9996 \text{ \AA}$ ,  $\alpha = \beta = \gamma = 90^\circ$ ,  $V = 174.935 \text{ \AA}^3$ ;  
space group: Pmn21(31).

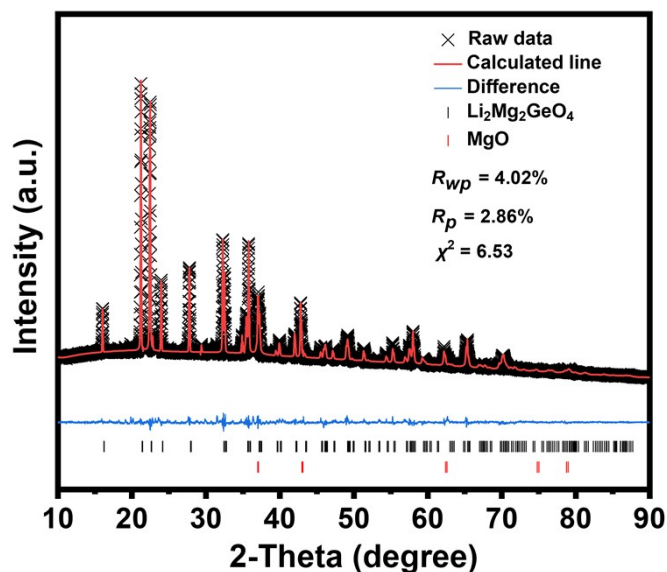

**Fig. S3** Rietveld refinement of the LMGO:1.0%Mn:1.0MgO.

**Table S3** Lattice parameters and agreement factors for LMGO:1.0%Mn:1.0MgO refined by Rietveld method, when  $\text{Mn}^{4+}$  ions occupy the cationic sites of  $\text{Ge}^{4+}$ .

| Doped concentration      | $x = 0.01$   |
|--------------------------|--------------|
| Crystal system           | orthorhombic |
| Space group              | <i>Pmn21</i> |
| a (Å)                    | 6.39174      |
| b (Å)                    | 5.47387      |
| c (Å)                    | 4.99974      |
| Volume (Å <sup>3</sup> ) | 174.928      |
| Z                        | 2            |
| $R_{wp}$ (%)             | 4.02         |
| $R_p$ (%)                | 2.86         |
| $\chi^2$                 | 6.53         |

**Table S4** Resulted occupancy of atoms assuming  $\text{Mn}^{4+}$  ions occupy the  $\text{Ge}^{4+}$  sites for LMGO:1.0%Mn:1.0MgO.

| Name | Site | x       | y       | z       | Occupancy |
|------|------|---------|---------|---------|-----------|
| Li0  | 4b   | 0.25366 | 0.17089 | 0.00196 | 1.00000   |
| Mg1  | 2a   | 0.00000 | 0.32036 | 0.48690 | 1.00000   |
| Ge2  | 2a   | 0.00000 | 0.67277 | 0.00413 | 0.99057   |
| O3   | 4b   | 0.22242 | 0.84096 | 0.86858 | 1.00000   |
| O4   | 2a   | 0.00000 | 0.35849 | 0.90992 | 1.00000   |
| O5   | 2a   | 0.00000 | 0.70913 | 0.36687 | 1.00000   |
| Mn6  | 2a   | 0.00000 | 0.67277 | 0.00413 | 0.00943   |

In the following Table S5 to S14, there is a special treatment to Mn ion: As stated in the work of “*Dalton Trans.* 2021, **50**, 8803”, when the Mn ion was doped in the site of Li<sup>+</sup>/Mg<sup>2+</sup> in tetrahedral [LiO<sub>4</sub>] and [MgO<sub>4</sub>], the Mn ion should be Mn<sup>2+</sup>. Therefore, in our assumption cases of Mn ion located at Li<sup>+</sup>/Mg<sup>2+</sup>, Mn<sup>2+</sup> instead of Mn<sup>4+</sup> was adopted for Rietveld refinement.

**Table S5** Lattice parameters and agreement factors for LMGO:1.0%Mn:1.0MgO refined by Rietveld method, assuming that the cationic sites of Li<sup>+</sup> is occupied by Mn<sup>2+</sup>.

| Doped concentration      | x = 0.01     |
|--------------------------|--------------|
| Crystal system           | orthorhombic |
| Space group              | <i>Pmn21</i> |
| a (Å)                    | 6.39131      |
| b (Å)                    | 5.47845      |
| c (Å)                    | 4.99874      |
| Volume (Å <sup>3</sup> ) | 175.028      |
| Z                        | 2            |
| R <sub>wp</sub> (%)      | 5.898        |
| R <sub>p</sub> (%)       | 3.88         |
| χ <sup>2</sup>           | 12.9         |

**Table S6** The resulted occupancy of atoms assuming that the Li<sup>+</sup> sites in LMGO:1.0%Mn:1.0MgO is occupied by Mn<sup>2+</sup>.

| Name | Site | x       | y       | z       | Occupancy |
|------|------|---------|---------|---------|-----------|
| Li0  | 4b   | 0.25639 | 0.18232 | 0.00201 | 0.99704   |
| Mg1  | 2a   | 0.00000 | 0.30742 | 0.45615 | 1.00000   |
| Ge2  | 2a   | 0.00000 | 0.66240 | 0.00398 | 1.00000   |
| O3   | 4b   | 0.20555 | 0.83343 | 0.86434 | 1.00000   |
| O4   | 2a   | 0.00000 | 0.35587 | 0.88967 | 1.00000   |
| O5   | 2a   | 0.00000 | 0.70666 | 0.38923 | 1.00000   |
| Mn6  | 4b   | 0.25639 | 0.18232 | 0.00201 | 0.00296   |

**Table S7** Lattice parameters and agreement factors for LMGO:1.0%Mn:1.0MgO refined by Rietveld method, assuming that the cationic sites of Mg<sup>2+</sup> is occupied by Mn<sup>2+</sup>.

| Doped concentration      | x = 0.01     |
|--------------------------|--------------|
| Crystal system           | orthorhombic |
| Space group              | <i>Pmn21</i> |
| a (Å)                    | 6.39092      |
| b (Å)                    | 5.47866      |
| c (Å)                    | 4.99722      |
| Volume (Å <sup>3</sup> ) | 174.971      |
| Z                        | 2            |
| R <sub>wp</sub> (%)      | 6.305        |
| R <sub>p</sub> (%)       | 4.12         |
| χ <sup>2</sup>           | 14.7         |

**Table S8** The resulted occupancy of atoms assuming that the  $\text{Mg}^{2+}$  sites in LMGO:1.0%Mn:1.0MgO is occupied by  $\text{Mn}^{2+}$ .

| Name | Site | x       | y       | z        | Occupancy |
|------|------|---------|---------|----------|-----------|
| Li0  | 4b   | 0.26098 | 0.17580 | 0.001867 | 1.00000   |
| Mg1  | 2a   | 0.00000 | 0.31757 | 0.46675  | 1.00051   |
| Ge2  | 2a   | 0.00000 | 0.66046 | 0.00452  | 1.00000   |
| O3   | 4b   | 0.20998 | 0.85298 | 0.86268  | 1.00000   |
| O4   | 2a   | 0.00000 | 0.36168 | 0.89009  | 1.00000   |
| O5   | 2a   | 0.00000 | 0.71328 | 0.40975  | 1.00000   |
| Mn6  | 2a   | 0.00000 | 0.31757 | 0.46675  | -0.00051  |

**Table S9** Lattice parameters and agreement factors for LMGO:1.0%Mn:1.0MgO refined by Rietveld method, assuming that the  $\text{Mn}^{4+}$  ions occupy the cationic sites of  $\text{Ge}^{4+}$  and the  $\text{Mn}^{2+}$  ions occupy  $\text{Li}^+$  ion sites.

| Doped concentration      | x = 0.01     |
|--------------------------|--------------|
| Crystal system           | orthorhombic |
| Space group              | <i>Pmn21</i> |
| a (Å)                    | 6.39178      |
| b (Å)                    | 5.47948      |
| c (Å)                    | 4.99978      |
| Volume (Å <sup>3</sup> ) | 175.111      |
| Z                        | 2            |
| $R_{wp}$ (%)             | 5.122        |
| $R_p$ (%)                | 3.36         |
| $\chi^2$                 | 9.70         |

**Table S10** Resulted occupancy of atoms when  $\text{Mn}^{4+}$  ions occupy the  $\text{Ge}^{4+}$  sites and  $\text{Mn}^{2+}$  ions occupy the  $\text{Li}^+$  sites for LMGO:1.0%Mn:1.0MgO.

| Name | Site | x       | y       | z       | Occupancy |
|------|------|---------|---------|---------|-----------|
| Li0  | 4b   | 0.24711 | 0.18355 | 0.00197 | 0.99854   |
| Mg1  | 2a   | 0.00000 | 0.31348 | 0.47098 | 1.00000   |
| Ge2  | 2a   | 0.00000 | 0.66286 | 0.00432 | 0.99146   |
| O3   | 4b   | 0.22182 | 0.85114 | 0.86260 | 1.00000   |
| O4   | 2a   | 0.00000 | 0.32528 | 0.91200 | 1.00000   |
| O5   | 2a   | 0.00000 | 0.68906 | 0.68907 | 1.00000   |
| Mn6  | 2a   | 0.00000 | 0.66286 | 0.00432 | 0.00854   |
| Mn7  | 4b   | 0.24711 | 0.18355 | 0.00197 | 0.00146   |

**Table S11** Lattice parameters and agreement factors for LMGO:1.0%Mn:1.0MgO refined by Rietveld method, when Mn<sup>4+</sup> ions occupy the cationic sites of Ge<sup>4+</sup> and Mn<sup>2+</sup> ions occupy Mg<sup>2+</sup> ion sites.

| Doped concentration      | x = 0.01     |
|--------------------------|--------------|
| Crystal system           | orthorhombic |
| Space group              | <i>Pmn21</i> |
| a (Å)                    | 6.39155      |
| b (Å)                    | 5.47882      |
| c (Å)                    | 4.99861      |
| Volume (Å <sup>3</sup> ) | 175.042      |
| Z                        | 2            |
| R <sub>wp</sub> (%)      | 6.395        |
| R <sub>p</sub> (%)       | 4.17         |
| χ <sup>2</sup>           | 15.16        |

**Table S12** Resulted occupancy of atoms when Mn<sup>4+</sup> ions occupy the Ge<sup>4+</sup> sites and Mn<sup>2+</sup> ions occupy the Mg<sup>2+</sup> sites for LMGO:1.0%Mn:1.0MgO.

| Name | Site | x       | y       | z       | Occupancy |
|------|------|---------|---------|---------|-----------|
| Li0  | 4b   | 0.26231 | 0.17589 | 0.00224 | 1.00000   |
| Mg1  | 2a   | 0.00000 | 0.31289 | 0.49641 | 0.99936   |
| Ge2  | 2a   | 0.00000 | 0.66278 | 0.00411 | 0.99064   |
| O3   | 4b   | 0.20954 | 0.83981 | 0.85298 | 1.00000   |
| O4   | 2a   | 0.00000 | 0.36349 | 0.89458 | 1.00000   |
| O5   | 2a   | 0.00000 | 0.70737 | 0.39061 | 1.00000   |
| Mn6  | 2a   | 0.00000 | 0.31289 | 0.49641 | 0.00064   |
| Mn7  | 2a   | 0.00000 | 0.66278 | 0.00411 | 0.00936   |

**Table S13** Lattice parameters and agreement factors for LMGO:1.0%Mn:1.0MgO refined by Rietveld method, when Mn<sup>4+</sup> ions occupy the cationic sites of Ge<sup>4+</sup> and Mn<sup>2+</sup> ions occupy Mg<sup>2+</sup>/Li<sup>+</sup> ion sites.

| Doped concentration      | x = 0.01     |
|--------------------------|--------------|
| Crystal system           | orthorhombic |
| Space group              | <i>Pmn21</i> |
| a (Å)                    | 6.39129      |
| b (Å)                    | 5.47864      |
| c (Å)                    | 4.99747      |
| Volume (Å <sup>3</sup> ) | 174.989      |
| Z                        | 2            |
| R <sub>wp</sub> (%)      | 6.502        |
| R <sub>p</sub> (%)       | 4.23         |
| χ <sup>2</sup>           | 15.68        |

**Table S14** Resulted occupancy of atoms when  $Mn^{4+}$  ions occupy the  $Ge^{4+}$  sites and  $Mn^{2+}$  ions occupy the  $Mg^{2+}/Li^+$  sites for LMGO:1.0%Mn:1.0MgO.

| Name | Site | x       | y       | z       | Occupancy |
|------|------|---------|---------|---------|-----------|
| Li0  | 4b   | 0.24165 | 0.17913 | 0.00204 | 0.99864   |
| Mg1  | 2a   | 0.00000 | 0.33117 | 0.46905 | 1.00047   |
| Ge2  | 2a   | 0.00000 | 0.65853 | 0.00510 | 0.99089   |
| O3   | 4b   | 0.17075 | 0.86279 | 0.86167 | 1.00000   |
| O4   | 2a   | 0.00000 | 0.33681 | 0.89365 | 1.00000   |
| O5   | 2a   | 0.00000 | 0.68398 | 0.40508 | 1.00000   |
| Mn6  | 4b   | 0.24165 | 0.17913 | 0.00204 | 0.00136   |
| Mn7  | 2a   | 0.00000 | 0.33117 | 0.46905 | -0.00047  |
| Mn8  | 2a   | 0.00000 | 0.65853 | 0.00510 | 0.00911   |

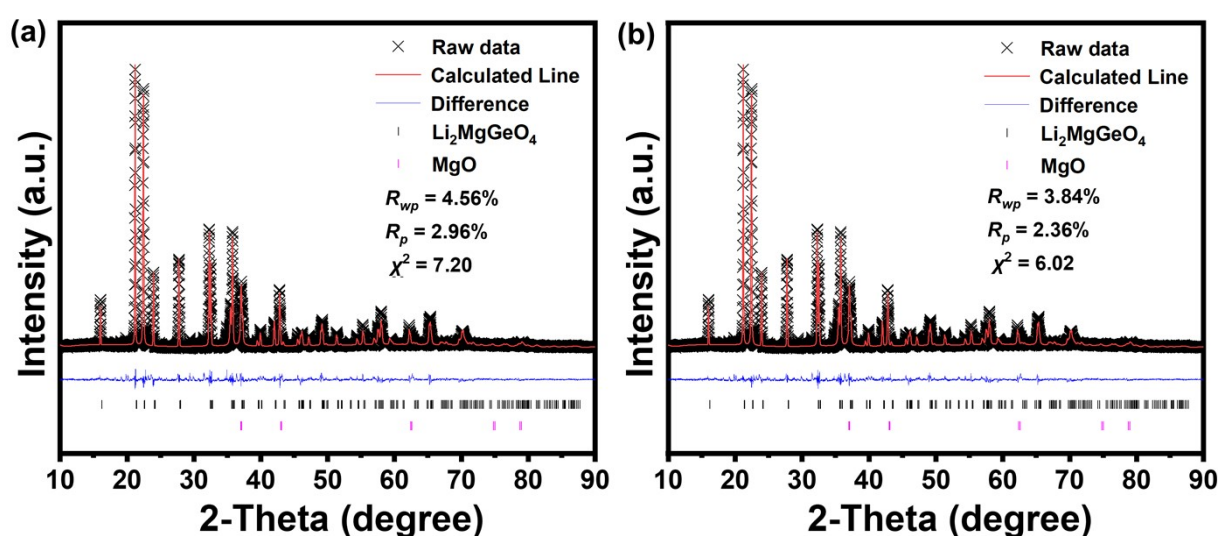

**Fig. S4** Rietveld refinements of LMGO-Mn-1.0 without (a) and with (b) compensation of  $Li^+$  defects with  $Mg^{2+}$ .

**Table S15** Refined results of LMGO-Mn-1.0 ( $Mg^{2+}$  ions occupy  $Li^+$  positions).

| Atom | X      | Y      | Z      | Occupancy |
|------|--------|--------|--------|-----------|
| Ge   | 0.0000 | 0.6722 | 0.0042 | 1.0000    |
| Mg   | 0.0000 | 0.3202 | 0.4867 | 1.0000    |
| Li   | 0.2537 | 0.1709 | 0.0019 | 0.8353    |
| O3   | 0.2224 | 0.8410 | 0.8686 | 1.0000    |
| O4   | 0.0000 | 0.3587 | 0.9102 | 1.0000    |
| O5   | 0.0000 | 0.7095 | 0.3669 | 1.0000    |
| Mg6  | 0.2537 | 0.1709 | 0.0019 | 0.1647    |

Cell parameters:  $a = 6.3915 \text{ \AA}$ ,  $b = 5.4799 \text{ \AA}$ ,  $c = 4.9994 \text{ \AA}$ ,  $\alpha = \beta = \gamma = 90^\circ$ ,  $V = 175.103 \text{ \AA}^3$ ; space group: Pmn21(31).



**Table S16** The phase molar fraction of LMGO and MgO in LMGO-Mn-1.0 obtained by Rietveld refinement of X-ray diffraction data.

|                     | Expectation value | Calculated value 1 | Calculated value 2 |
|---------------------|-------------------|--------------------|--------------------|
| LMGO molar fraction | 50%               | 50.86%             | 54.26%             |
| MgO molar fraction  | 50%               | 49.14%             | 45.74%             |
| Ratio               | 1.0               | 1.03               | 1.19               |

The expectation value is the stoichiometric ratio of the sample weighing, the calculated value 1 is the result of  $Mg^{2+}$  not compensating for the  $Li^+$  defects, and the calculated value 2 is the result when  $Mg^{2+}$  compensates for the  $Li^+$  defects.

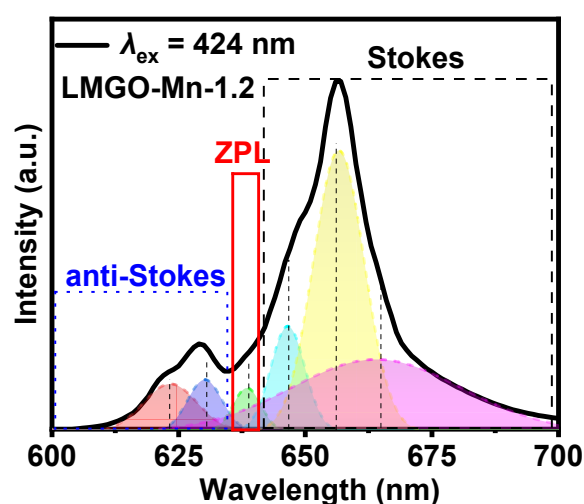

**Fig. S5** The fitted results from PL spectrum of LMGO-Mn-1.2.

**Table S17** The decay dynamics parameters of LMGO-Mn-0.0 to LMGO-Mn-1.5 red phosphors.

| Samples      | $A_1$   | $\tau_1$ (ms) | $A_2$   | $\tau_2$ (ms) | $\tau_{avg}$ (ms) | $R^2$ |
|--------------|---------|---------------|---------|---------------|-------------------|-------|
| LMGO-Mn-0.0  | 621.261 | 0.573         | 215.591 | 2.631         | 1.837             | 0.986 |
| LMGO-Mn-0.4  | 113.252 | 0.628         | 138.770 | 2.684         | 2.354             | 0.986 |
| LMGO-Mn-0.6  | 145.137 | 0.616         | 205.196 | 2.760         | 2.467             | 0.989 |
| LMGO-Mn-1.0  | 687.535 | 0.762         | 920.248 | 2.762         | 2.420             | 0.998 |
| LMGO-Mn -1.2 | 652.086 | 0.596         | 988.597 | 2.699         | 2.432             | 0.998 |
| LMGO-Mn -1.5 | 538.823 | 0.670         | 837.863 | 2.739         | 2.458             | 0.997 |
